# Supplementary material for: Whole-Genome Investigation of Zoonotic Transmission of Livestock-Associated Methicillin-Resistant Staphylococcus aureus Clonal Complex 398 Isolated from Pigs and Humans in Thailand
Source: MDPI journal article supplement (doi:10.3390/antibiotics12121745), 2023-12-16
Supplement: s1 [file s1]

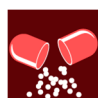

## Supplementary Materials

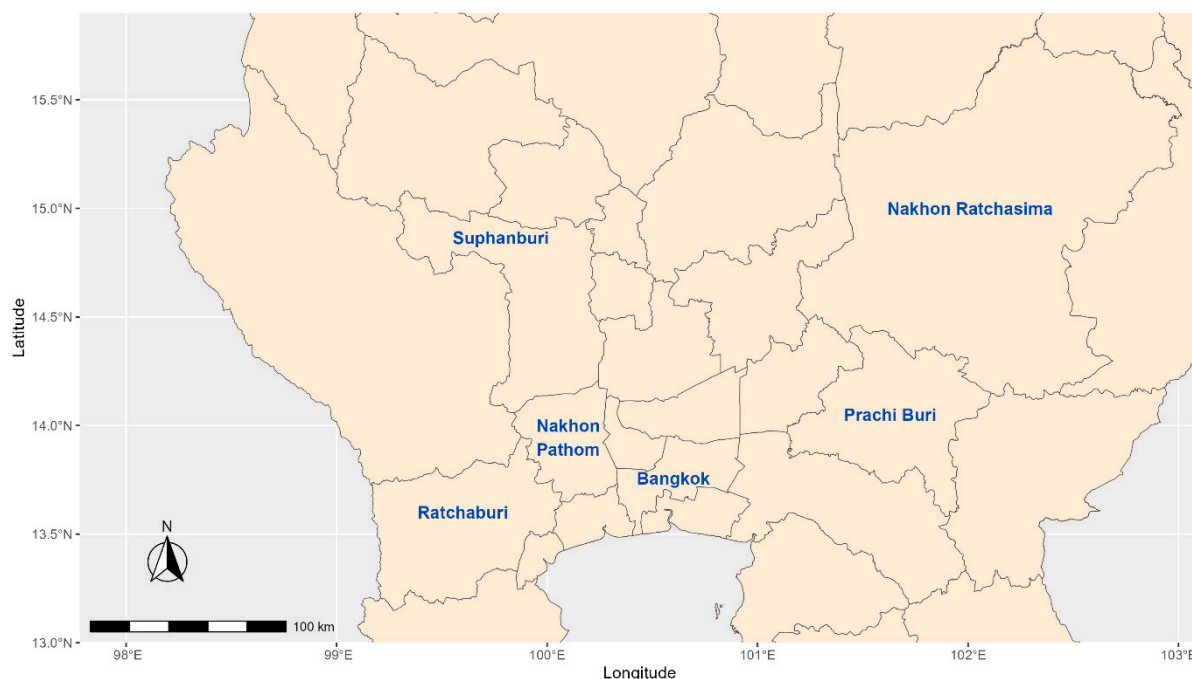

**Figure S1.** Map focusing on the central region of Thailand. It presents the location of 6 cities, 5 of which are sources of the 16 representative isolates of LA-MRSA CC9 and CC398. The capital city of Bangkok is used as a landmark. This map was created by several packages, including ggplot2 [68], raster [69], sf [70] and tidyverse [71], on RStudio v2023.06.1+524 (<https://rstudio.com/>, accessed on 18 July 2023). Geometric data of province boundaries were downloaded from the Database of Global Administrative Areas v4.1 (<https://gadm.org/>, accessed on 18 July 2023).

**Table S1.** Pairwise SNP distance matrix of the 13 LA-MRSA CC398 isolates based on core genome alignment. The minimum pairwise SNP distances between porcine and human isolates were 10 and 3 in Farm 1 and Farm 3, respectively, verifying the pig-to-human transmission caused by LA-MRSA CC398.

| Pairwise SNP distance matrix<br>of the 13 LA-MRSA CC398<br>isolates |         |       | L3.1   | L43.2  | Z19.1  | M3.1   | M31.1  | AA3.1  | D16.1  | S2.1   | X1.1   | Y1.2   | G2.1   | H49.1   | J101.2  |
|---------------------------------------------------------------------|---------|-------|--------|--------|--------|--------|--------|--------|--------|--------|--------|--------|--------|---------|---------|
|                                                                     |         |       | Farm 1 | Farm 1 | Farm 1 | Farm 3 | Farm 3 | Farm 4 | Farm 5 | Farm 7 | Farm 7 | Farm 8 | Farm 9 | Farm 10 | Farm 11 |
|                                                                     |         |       | Pig    | Human  | Pig    | Pig    | Human  | Pig     | Human   |
| L3.1                                                                | Farm 1  | Pig   | 0      | 11     | 13     | 503    | 506    | 505    | 506    | 500    | 508    | 476    | 501    | 491     | 239     |
| L43.2                                                               | Farm 1  | Human | 11     | 0      | 10     | 503    | 506    | 505    | 506    | 500    | 508    | 476    | 501    | 491     | 238     |
| Z19.1                                                               | Farm 1  | Pig   | 13     | 10     | 0      | 504    | 507    | 506    | 507    | 501    | 509    | 477    | 502    | 492     | 240     |
| M3.1                                                                | Farm 3  | Pig   | 503    | 503    | 504    | 0      | 3      | 2      | 51     | 45     | 53     | 37     | 48     | 40      | 557     |
| M31.1                                                               | Farm 3  | Human | 506    | 506    | 507    | 3      | 0      | 3      | 38     | 46     | 54     | 38     | 49     | 41      | 560     |
| AA3.1                                                               | Farm 4  | Pig   | 505    | 505    | 506    | 2      | 3      | 0      | 51     | 45     | 53     | 37     | 48     | 40      | 559     |
| D16.1                                                               | Farm 5  | Pig   | 506    | 506    | 507    | 51     | 52     | 51     | 0      | 38     | 14     | 29     | 23     | 21      | 560     |
| S2.1                                                                | Farm 7  | Pig   | 500    | 500    | 501    | 45     | 46     | 45     | 38     | 0      | 40     | 24     | 35     | 27      | 554     |
| X1.1                                                                | Farm 7  | Pig   | 508    | 508    | 509    | 53     | 54     | 53     | 14     | 40     | 0      | 30     | 25     | 23      | 562     |
| Y1.2                                                                | Farm 8  | Pig   | 476    | 476    | 477    | 37     | 37     | 37     | 29     | 24     | 30     | 0      | 26     | 20      | 515     |
| G2.1                                                                | Farm 9  | Pig   | 501    | 501    | 502    | 48     | 49     | 48     | 23     | 35     | 25     | 26     | 0      | 18      | 555     |
| H49.1                                                               | Farm 10 | Pig   | 491    | 491    | 492    | 40     | 41     | 40     | 21     | 27     | 23     | 20     | 18     | 0       | 545     |
| J101.2                                                              | Farm 11 | Human | 239    | 238    | 240    | 557    | 560    | 559    | 560    | 554    | 562    | 515    | 555    | 545     | 0       |

**Table S2.** Distribution of five stress genes identified by the AMRFinderPlus database among the 16 LA-MRSA CC9 and CC398.

| Strain name | Origin | Farm | Location          | Sequence type | Clonal complex | SCC <sub>mec</sub> type | spa type | Arsenite efflux transporter membrane subunit | Thioredoxin-dependent arsenate reductase | Multidrug efflux MFS transporter | Multi-copper oxidase | Quaternary ammonium compound efflux SMR transporter |
|-------------|--------|------|-------------------|---------------|----------------|-------------------------|----------|----------------------------------------------|------------------------------------------|----------------------------------|----------------------|-----------------------------------------------------|
|             |        |      |                   |               |                |                         |          | <i>arsB</i>                                  | <i>arsC</i>                              | <i>lmrS</i>                      | <i>mco</i>           | <i>qacG</i>                                         |
| Q10.1       | Pig    | 6    | Prachin Buri      | 9             | 9              | IX                      | t337     |                                              |                                          |                                  |                      |                                                     |
| Y1.3        | Pig    | 8    | Prachin Buri      | 4576          | 9              | IX                      | t337     |                                              |                                          |                                  |                      |                                                     |
| BA3.1       | Pig    | 2    | Ratchaburi        | 9             | 9              | IX                      | t337     |                                              |                                          |                                  |                      |                                                     |
| J101.2      | Human  | 11   | Prachin Buri      | 398           | 398            | CI                      | t034     |                                              |                                          |                                  |                      |                                                     |
| L3.1        | Pig    | 1    | Nakhon Pathom     | 398           | 398            | CI                      | t034     |                                              |                                          |                                  |                      |                                                     |
| L43.2       | Human  | 1    | Nakhon Pathom     | 398           | 398            | CI                      | t034     |                                              |                                          |                                  |                      |                                                     |
| Z19.1       | Pig    | 1    | Nakhon Pathom     | 398           | 398            | CI                      | t034     |                                              |                                          |                                  |                      |                                                     |
| AA3.1       | Pig    | 4    | Suphanburi        | 398           | 398            | V                       | t034     |                                              |                                          |                                  |                      |                                                     |
| M3.1        | Pig    | 3    | Suphanburi        | 398           | 398            | V                       | t034     |                                              |                                          |                                  |                      |                                                     |
| M31.1       | Human  | 3    | Suphanburi        | 398           | 398            | V                       | t034     |                                              |                                          |                                  |                      |                                                     |
| Y1.2        | Pig    | 8    | Prachin Buri      | 398           | 398            | V                       | t034     |                                              |                                          |                                  |                      |                                                     |
| S2.1        | Pig    | 7    | Prachin Buri      | 398           | 398            | V                       | t034     |                                              |                                          |                                  |                      |                                                     |
| H49.1       | Pig    | 10   | Nakhon Ratchasima | 398           | 398            | V                       | t034     |                                              |                                          |                                  |                      |                                                     |
| G2.1        | Pig    | 9    | Nakhon Ratchasima | 398           | 398            | V                       | t034     |                                              |                                          |                                  |                      |                                                     |
| D16.1       | Pig    | 5    | Prachin Buri      | 398           | 398            | V                       | t034     |                                              |                                          |                                  |                      |                                                     |
| X1.1        | Pig    | 7    | Prachin Buri      | 398           | 398            | V                       | t034     |                                              |                                          |                                  |                      |                                                     |

Grey color indicates the presence of genes harbored by each isolate. MFS: the major facilitator superfamily, SMR: small multidrug resistance.
